# Supplementary material
Source: publisher figshare collection journal article supplement (https://gsajournals.figshare.com/ndownloader/files/13669694)
Supplement: Supplementary file 1 [file 13669694]

**Table S1 List of target-specific guide sequences**

| **Target** | **Figure** | **Target-specific guide sequence (5’ to 3’)** | **Coordinates** | **Strand** | **Guide name** |
| --- | --- | --- | --- | --- | --- |
| *atf-2* (GG) | 10AB | ACAAACCACCGAAAGUCUGG | II: 8752020..8752039 | non-coding | crispr_bf3 |
| *atf-2* (TG) | 10F-H | ACAAACCACCGAAAGUCUUG | II: 8752020..8752039 | non-coding | crispr_bf34 |
| *Cbr ben-1* | 8B | CAACCUGAUGGAACCUACAA | III: 4215409..4215428* | coding | crispr_bf39 |
| *Ce ben-1* | 8A | CAGCCUGAUGGAACUUAUAA | III: 3541484..3541503 | coding | crispr_bf41 |
| Chr. I | 2AB, 5B, S5A | AUCGCCGACUUGCGAGGAGG | I: 2850996..2851015 | intergenic | crispr_bf27 |
| Chr. I | 5B | GGGAUAAUUGAGAUGAGGGG | I: 2851095..2851114 | intergenic | crispr_bf28 |
| Chr. X | 5AB, S2 | CACAACGGGUGCAACGGAUA | X: 16623472..16623491 | intergenic | crispr_bf56 |
| Chr. X | 5AB, S2 | UUGGUUCAAUGUAGGCAUGG | X: 16623828..16623847 | intergenic | crispr_bf57 |
| *coh-4* | 9B | UAUCGACGAGCUGGCAAUGG | V: 4170131..4170150 | coding | AFScr007 |
| *dpy-10* | 2-7, 9-12, S2, S4, S5 | GCUACCAUAGGCACCACGAG | II: 6711193..6711212 | non-coding | crispr_bf32 |
| *hum-4* | 6, S4 | CGGUUUCAAGGUGAGGCUGG | X: 11422917..11422936 | non-coding | crispr_bf63 |
| *lir-2* | 1, 2AB, 4B, 9A, S5C | GGCUGAUUUUCGCAGUUCGG | II: 7668026..7668045 | non-coding | crispr_bf8 |
| *Cbr rpb-1* | 8B | ACUCCGACGAGAGCCAUCUG | IV: 13510052..13510071* | non-coding | crispr_nf12 |
| *rol-6* | 1 | GUGAGACGUCAACAAUAUGG | II: 8733305..8733324 | coding | crispr_bf33 |
| *sdc-2* | 5C | UAUCCACAUUCCAAAGUUGG | X: 11524026..11524045 | non-coding | crispr_bf18 |
| *sdc-2* | 5C | CCAACUUGAAAUUCAACGGG | X: 11524600..11524619 | non-coding | crispr_bf19 |
| *sex-1* (GG) | 1, 2AB, 3, 4A, 7, S5B | GGAUGAGAAUCUGACAAAGG | X: 10201599..10201618 | non-coding | crispr_bf4 |
| *sex-1* (AG) | 7, 10C-E | GGAUGAGAAUCUGACAAAAG | X: 10201599..10201618 | non-coding | crispr_bf5 |
| *sex-1* (CG) | 7 | GGAUGAGAAUCUGACAAACG | X: 10201599..10201618 | non-coding | crispr_bf7 |
| *sex-1* (TG) | 7 | GGAUGAGAAUCUGACAAAUG | X: 10201599..10201618 | non-coding | crispr_bf6 |
| *sex-1* | 8A | AACAUUUCCACAACGAGAGG | X: 10201805..10201824 | non-coding | crispr_bf47 |
| *xol-1 promoter* | 5C | GUGUACGUAGGUCAAAGAGG | X: 8040037..8040056 | intergenic | crispr_bf20 |
| *xol-1* | 5CD | GGUUUCGAAGUUCAACAAGG | X: 8042847..8042866 | coding | crispr_bf21 |
| *xol-1* | 5D | CGAGGUUUCACCGGGGCUAA | X: 8043548..8043567 | coding | crispr_bf60 |
| *Ce zen-4 (cle10* ts*)* | 9AB, S3 | UGAUGGAAGCUAACUACCAG | IV: 6120015..6120034 | coding | crispr_bf46 |
| *Ce zen-4* (make / use *cle5* ts) | S3 | UAUGAUUCGCCAAUACAUGA | IV: 6119998..6120017 | coding | crispr_bf25 |
| *Ce zen-4* (make *cle10* ts) | S3 | ACUGUCAAACAGAAUGUCGG | IV: 6119831..6119850 | non-coding | AFScr14 |
| *Ce zen-4* (make *cle10* ts) | S3 | UUGCUCUCCUUGCUCACACG | IV: 6120156..6120175 | non-coding | AFScr15 |
| synthetic target 1 | 6, S4 | GGCUGACAUCCAGUAGACGG |  | N.A. | crispr_bf58 |
| synthetic target 2 | 6, S4 | GCGACGUAACGUGAGAUAGG |  | N.A. | crispr_bf59 |

This table lists the target-specific sequence for each guide RNA, the name of its targeted locus, the figure showing the results, the genomic coordinates

corresponding to the guide, whether the guide corresponded to the coding or non-coding strand of the gene, and the reference name of the guide.

*Coordinates are based on the WUGSC 1.0/cb3 version of the *C. briggsae* genome. Other coordinates are from the Wbcel235/c11 version of the *C. elegans* genome*.*
